# Supplementary figures and images for: Study of the crystallinity of ZnO in the Zn/ZnO nanocable heterostructuresElectronic supplementary information (ESI) available: SEM and XRD. See http://www.rsc.org/suppdata/jm/b4/b400646a/
Source: Royal Society of Chemistry journal article supplement (doi:10.1039/b400646a), 2004-01-01

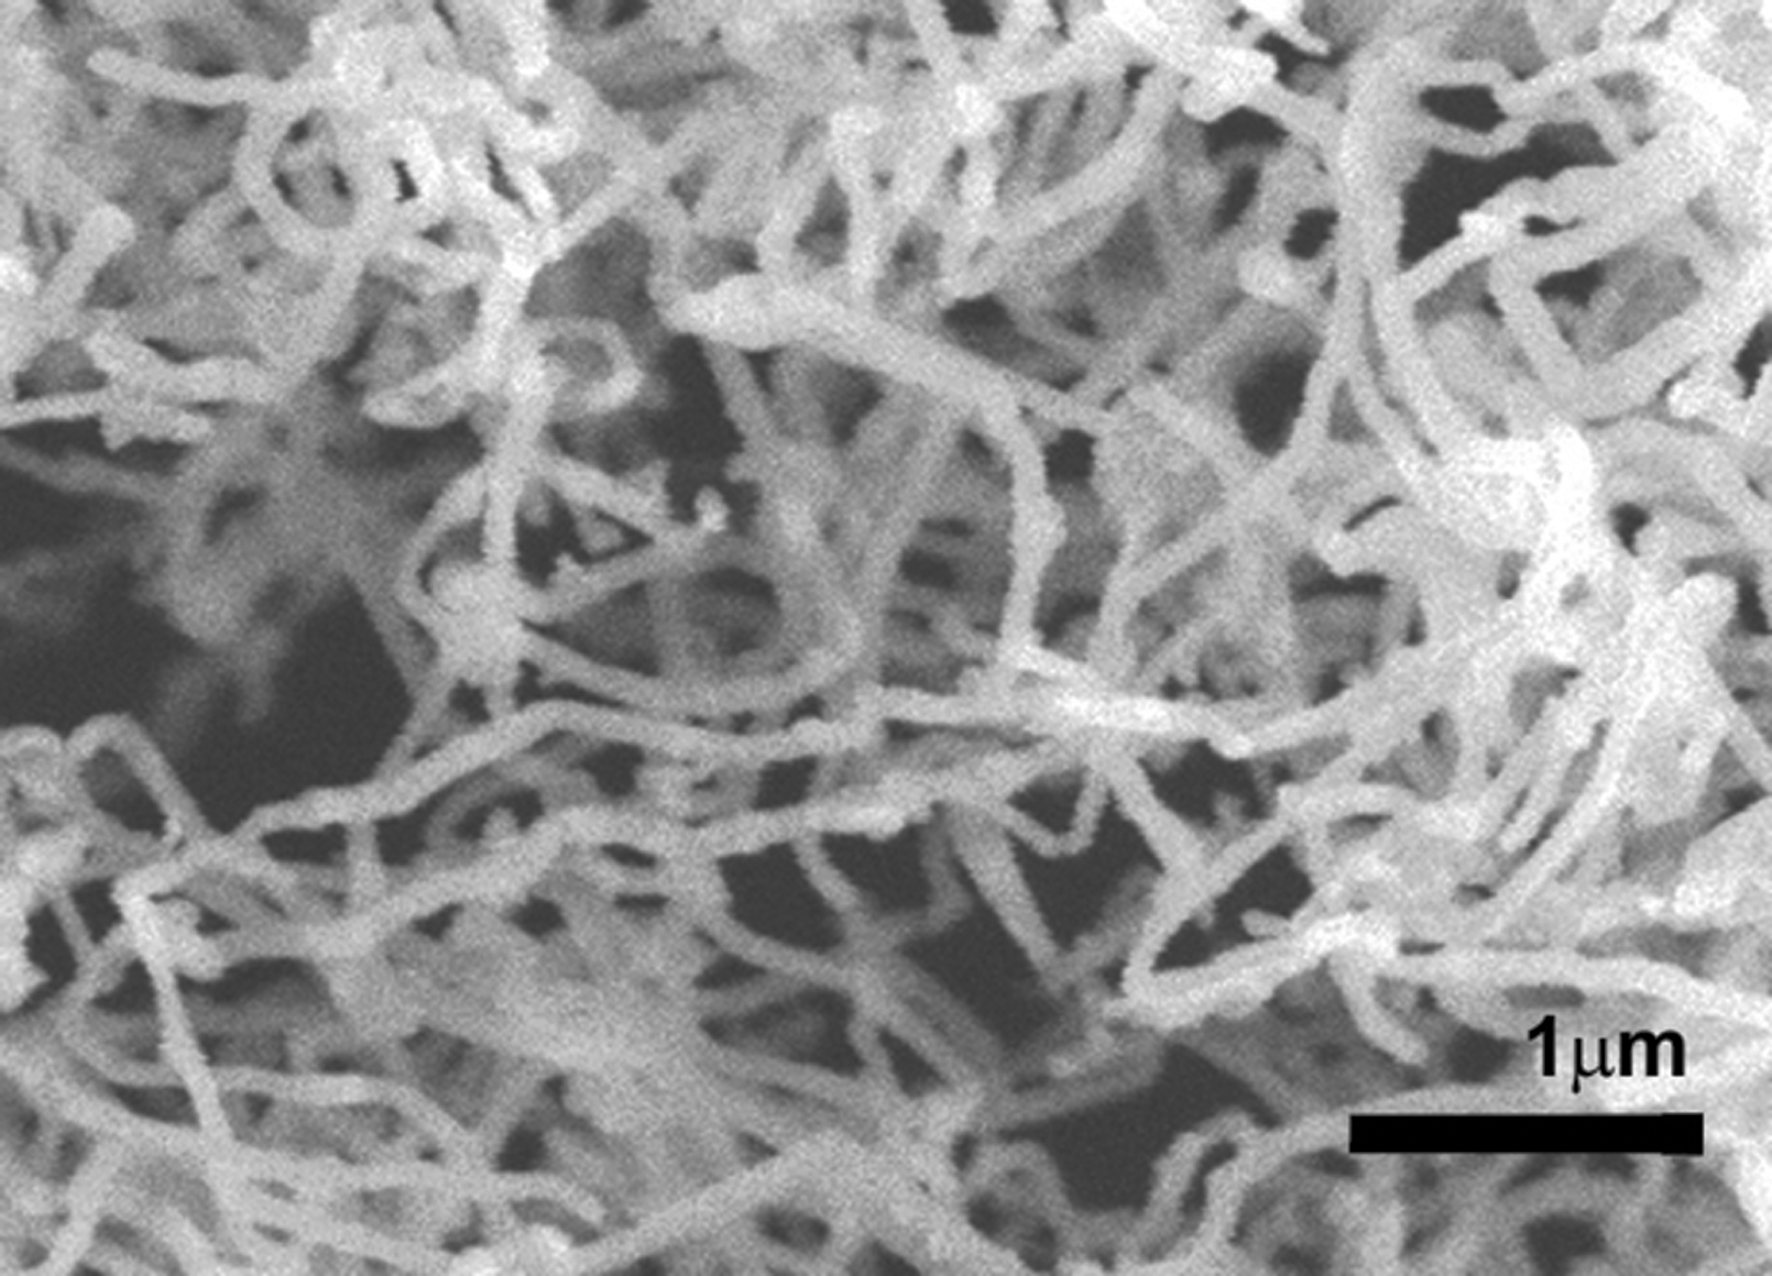


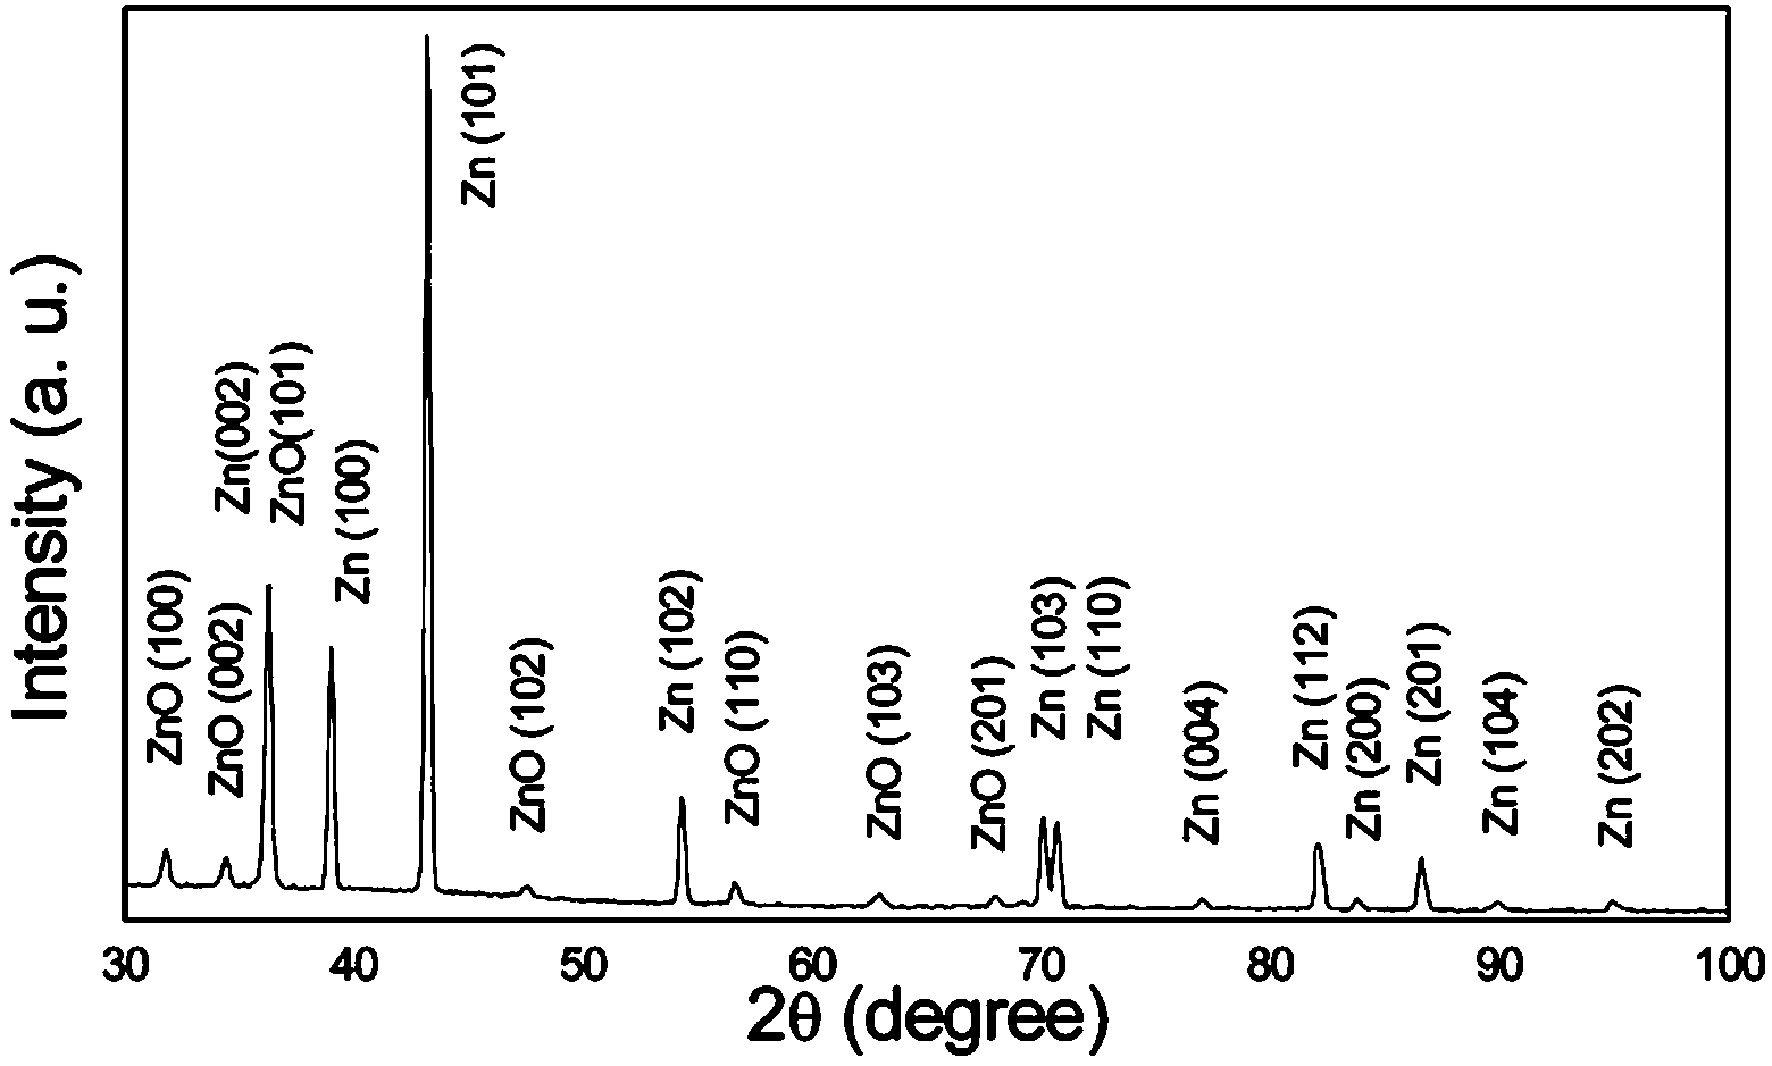

Supplement: b400646a.doc [file b400646a.doc]
